# Supplementary material
Source: Springer Nature journal article supplement (https://www.springermedizin.de/resource/supplementary/13006_2014_185_MOESM2_ESM.pdf/9628158)

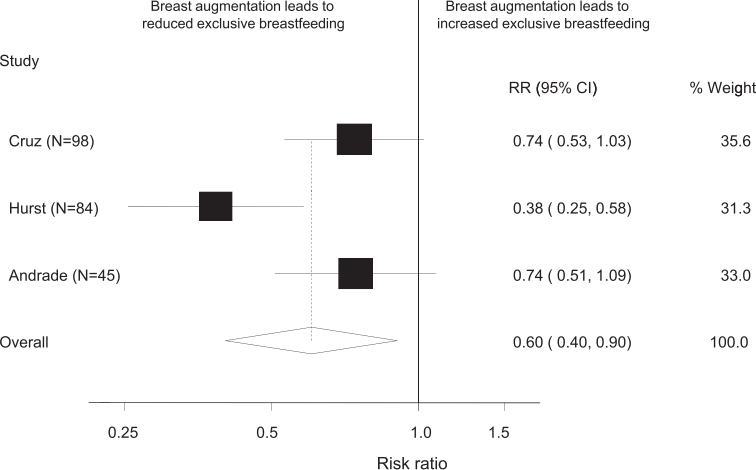

I-squared for heterogeneity=71.7%  
 heterogeneity chi-square=7.03 , P=0.03 for df=2  
 test of null hypothesis that RR=1: P=0.01

Supplement: MOESM2 [file 9628158]
